# Supplementary material for: Timing of Postdischarge Follow‐Up and Medication Adherence Among Patients With Heart Failure
Source: PubMed Central journal article supplement — J Am Heart Assoc. 2018 Apr 1;7(7):e007998. doi: 10.1161/JAHA.117.007998 (PMC5907587; doi:10.1161/jaha.117.007998), 2018-04-01
Supplement: JAH3-7-e007998-s001.pdf [file JAH3-7-e007998-s001.pdf]

# **SUPPLEMENTAL MATERIAL**

**Table S1. Variable Missing Rates and Imputation Methods for Model Covariates.**

| Variable                                  | Missing Rate | Note on Missing Imputation                                        |
|-------------------------------------------|--------------|-------------------------------------------------------------------|
| Demographics                              |              |                                                                   |
| Age*                                      | 0            |                                                                   |
| Female                                    | 0            |                                                                   |
| Race                                      | 2.41         | Recode as “Other”                                                 |
| SES                                       | 0            |                                                                   |
| Medical history: any field except smoking | 5.25         | Impute to “No,” as we assume it was not checked when none applied |
| Medical history: smoking                  | 0.26         | Impute to “No,” as we assume it was not checked when none applied |
| Vitals on admission                       |              |                                                                   |
| Heart rate, bpm*                          | 12.59        | Multiple imputation                                               |
| SBP, mmHg*                                | 11.45        | Multiple imputation                                               |
| DBP, mmHg*                                | 11.45        |                                                                   |
| BMI*                                      | 32.71        |                                                                   |
| LVEF groups                               | 1.18         | Recode category based on multiple imputed EF                      |

|                                           |       |                                                                        |
|-------------------------------------------|-------|------------------------------------------------------------------------|
| EF source                                 | 1.18  |                                                                        |
| EF, % *                                   | 5.91  | Multiple imputation                                                    |
| Lab measures                              |       |                                                                        |
| Serum sodium, mEq/L *                     | 33.38 | Multiple imputation                                                    |
| BNP, pg/mL *                              | 47.18 |                                                                        |
| NT-proBNP, pg/mL *                        | 91.81 |                                                                        |
| Serum creatinine, mg/dL *                 | 24.72 |                                                                        |
| BUN, mg/dL *                              | 33.04 | Multiple imputation                                                    |
| Discharge year of index hospitalization * | 0     |                                                                        |
| LOS                                       | 0     |                                                                        |
| Transferred-in                            | 6.21  | Impute to "No"                                                         |
| Hospital characteristics                  |       |                                                                        |
| Number of beds *                          | 0.06  | Impute to median                                                       |
| Geographic region                         | 0     |                                                                        |
| Rural location                            | 0     |                                                                        |
| Teaching status                           | 0.24  | Impute to "No," as we assume teaching hospitals are well identified in |

|                       |       |                                                                                                                                           |
|-----------------------|-------|-------------------------------------------------------------------------------------------------------------------------------------------|
| Heart transplant site | 10.66 | GWTG-HF Registry<br>Impute to “No,” as we assume hospitals capable of performing heart transplant are well identified in GWTG-HF Registry |
|-----------------------|-------|-------------------------------------------------------------------------------------------------------------------------------------------|

---

\*Continuous variables

Shaded variables are model covariates.

BMI indicates body mass index; BNP, b-type natriuretic peptide; bpm, beats per minute; BUN, blood urea nitrogen; DSP, diastolic blood pressure; EF, ejection fraction; LOS, length of stay; LVEF, left ventricular ejection fraction; NT-proBNP, N-terminal pro B-type natriuretic peptide; SBP, systolic blood pressure; SES, socioeconomic status
